# Supplementary material for: Method comparison of diabetes mellitus associated autoantibodies in serum specimens
Source: publisher site journal article supplement (doi:10.1515/cclm-2025-0137), 2025-08-22
Supplement: Supplementary file 1 [file j_cclm-2025-0137_suppl_001.docx]

| Supplemental Material  **GADA** | | |
| --- | --- | --- |
| Supplemental Figure 1A: Passing Bablok regression analysis of GADA tested on the Maglumi and the EI-Analyzer | Supplemental Figure 1B: Passing Bablok regression analysis of GADA tested on the iFlash and the EI-Analyzer | Supplemental Figure 1C: Passing Bablok regression analysis of GADA tested on the Maglumi and the iFlash |
| **IA-2A** | | |
| Supplemental Figure 1D: Passing Bablok regression analysis of IA-2A tested on the iFlash and the EI-Analyzer | Supplemental Figure 1E: Passing Bablok regression analysis of IA-2A tested on the Maglumi and the EI-Analyzer | Supplemental Figure 1F: Passing Bablok regression analysis of IA-2A tested on the Maglumi and the iFlash |
| **ZnT8A** | | |
| Supplemental Figure 1G: Passing Bablok regression analysis of ZnT8A tested on the iFlash and the EI-Analyzer | Supplemental Figure 1H: Passing Bablok regression analysis of ZnT8A tested on the Maglumi and the EI-Analyzer | Supplemental Figure 1I: Passing Bablok regression analysis of ZnT8A tested on the Maglumi and the iFlash |

Supplemental Figure 1: Passing Bablok regression analyses of all parameters on all tested devices

| **GADA** | | |
| --- | --- | --- |
| Supplemental Figure 2A: Bland Altman analysis of GADA tested on the Maglumi and the EI-Analyzer | Supplemental Figure 2B: Bland Altman analysis of GADA tested on the iFlash and the EI-Analyzer | Supplemental Figure 2C: Bland Altman analysis of GADA tested on the Maglumi and the iFlash |
| **IA-2A** | | |
| Supplemental Figure 2D: Bland Altman analysis of IA-2A tested on the iFlash and the EI-Analyzer | Supplemental Figure 2E: Bland Altman analysis of IA-2A tested on the Maglumi and the EI-Analyzer | Supplemental Figure 2F: Bland Altman analysis of IA-2A tested on the Maglumi and the iFlash |
| **ZnT8A** | | |
| Supplemental Figure 2G: Bland Altman analysis of ZnT8A tested on the iFlash and the EI-Analyzer | Supplemental Figure 2H: Bland Altman analysis of ZnT8A tested on the Maglumi and the EI-Analyzer | Supplemental Figure 2I: Bland Altman analysis of ZnT8A tested on the Maglumi and the iFlash |
|  |  |  |

Supplemental Figure 2: Bland Altman analyses of all parameters on all tested devices

| **GADA** | | |
| --- | --- | --- |
| Supplemental Figure 3A: Semiquantitative method agreement tested with bowker test and cohens kappa (weighted) between tests categorized as positive (2), borderline (1) and negative (0) for GADA on the Maglumi and the EI-Analyzer | Supplemental Figure 3B: Semiquantitative method agreement tested with bowker test and cohens kappa (weighted) between tests categorized as positive (2), borderline (1) and negative (0) for GADA on the iFlash and the EI-Analyzer | Supplemental Figure 3C: Semiquantitative method agreement tested with bowker test and cohens kappa (weighted) between tests categorized as positive (2), borderline (1) and negative (0) for GADA on the Maglumi and the iFlash |
| **IA-2A** | | |
| Supplemental Figure 3D: Semiquantitative method agreement tested with bowker test and cohens kappa (weighted) between tests categorized as positive (2), borderline (1) and negative (0) for IA-2A tested on the iFlash and the EI-Analyzer | Supplemental Figure 3E: Semiquantitative method agreement tested with bowker test and cohens kappa (weighted) between tests categorized as positive (2), borderline (1) and negative (0) for IA-2A tested on the Maglumi and the EI-Analyzer | Supplemental Figure 3F: Semiquantitative method agreement tested with bowker test and cohens kappa (weighted) between tests categorized as positive (2), borderline (1) and negative (0) for IA-2A tested on the Maglumi and the iFlash |
| **ZnT8A** | | |
| Supplemental Figure 3G: Semiquantitative method agreement tested with bowker test and cohens kappa (weighted) between tests categorized as positive (2), borderline (1) and negative (0) for ZnT8A tested on the iFlash and the EI-Analyzer | Supplemental Figure 3H: Semiquantitative method agreement tested with bowker test and cohens kappa (weighted) between tests categorized as positive (2), borderline (1) and negative (0) for ZnT8A tested on the Maglumi and the EI-Analyzer | Supplemental Figure 3I: Semiquantitative method agreement tested with bowker test and cohens kappa (weighted) between tests categorized as positive (2), borderline (1) and negative (0) for ZnT8A tested on the Maglumi and the iFlash |

Supplemental Figure 3: Semiquantitative method agreement tested with bowker test and cohens kappa (weighted) between tests categorized as positive (2), borderline (1) and negative (0) of all parameters on all tested devices

Supplemental Table 1: Cut-off values for tests on all three devices as specified by the manufacturer

| Cut-Offs | EUROIMMUN-Analyzer (ELISA) | iFlash 1800 (CLIA) | Maglumi 800 (CLIA) |
| --- | --- | --- | --- |
| GADA | 10 IE/mL | 10 IE/mL | 10 IE/mL |
| IA2A | 10 IE/mL | 10 IE/mL | 10 IE/mL |
| ZnT8A | 15 RU/mL | 10 RU/mL | 10 RU/mL |

Supplemental Table 2: Quantitative test results for all patient serum samples

| GADA | | | IA2A | | | ZnT8A | |
| --- | --- | --- | --- | --- | --- | --- | --- |
| EI-Analyzer | iFlash | Maglumi | EI-Analyzer | iFlash | Maglumi | EI-Analyzer | Maglumi |
| 1718.26 | 175.57 | 799 | 541.11 | 2 | 122 | 1989.16 | 243 |
| 1504.95 | 939.22 | 2000 | 517.56 | 364.45 | 378 | 1970.91 | 314 |
| 1271.47 | 253.26 | 2000 | 455.21 | 2 | 1000 | 1838.54 | 255 |
| 1005.72 | 24.21 | 429 | 452.77 | 2 | 180 | 829.7 | 81 |
| 990.36 | 119.11 | 743 | 421.3 | 1656 | 1000 | 716.64 | 76.2 |
| 418.3 |  | 349 | 432.97 | 611.19 | 473 | 577 | 303 |
| 367.85 | 11.97 | 256 | 432.17 | 2.57 | 6.65 | 447.95 | 56.2 |
| 331.38 | 11.47 | 303 | 420.26 | 4000 | 1000 | 388.11 | 30.1 |
| 261.73 | 14.6 | 219 | 405.76 | 86.05 | 194 | 229.57 | 24.5 |
| 247.26 | 0.53 | 68.1 | 398.02 | 2 | 535 | 219.78 | 3 |
| 215.02 | 23.5 | 198 | 378.38 | 3147.46 | 822 | 142.9 | 9.02 |
| 212.66 | 11.47 | 108 | 377.34 | 396.4 | 170 | 129.19 | 30.6 |
| 198.74 | 33.91 | 259 | 374.8 | 3041.58 | 1000 | 66.82 | 3.35 |
| 173.31 | 25.55 | 232 | 366.91 | 162.16 | 50.1 | 56.61 | 3 |
| 168.42 | 30.35 | 185 | 361.26 | 1974.78 | 641 | 49.84 | 6.72 |
| 165.41 | 21.1 | 150 | 348.33 | 365.38 | 161 | 41.71 | 4.81 |
| 162.21 | 15.71 | 142 | 342.46 | 105.63 | 521 | 37.74 | 5.88 |
| 157.11 | 7.47 | 152 | 284.32 | 4000 | 1000 | 26.79 | 25.7 |
| 148.93 | 15.85 | 168 | 271.11 | 2390.55 | 960 | 24.48 | 6.93 |
| 129.54 | 10.37 | 96.4 | 256.76 | 2 | 78.1 | 22.72 | 5.36 |
| 127.56 | 4.34 | 49.6 | 254.18 | 298.34 | 88.7 | 18.25 | 3 |
| 120.85 | 4.68 | 62.1 | 188.08 | 786.77 | 81.2 | 12.17 | 6.37 |
| 115.99 | 15.61 | 75.2 | 183.35 | 89.86 | 91.8 | 123.58 | 9.35 |
| 105.79 | 18.66 | 73.5 | 172.63 | 2 | 2 | 1782.83 | 284 |
| 103.27 | 21.22 | 95.9 | 166.12 | 126.13 | 57.8 | 1761.37 | 137 |
| 89.72 | 13.34 | 71.9 | 157.32 | 90.7 | 42.5 | 0 | 3 |
| 78.95 | 5.45 | 31.1 | 112.63 | 238.81 | 42.7 | 0 | 3 |
| 69.57 | 8.09 | 6.18 | 110.2 |  | 0 | 0 | 7.04 |
| 64.26 | 3.36 |  | 108.36 | 80.09 | 73.9 | 0 | 4.02 |
| 58.57 | 10.01 | 51.2 | 103.86 |  | 21 | 0 | 3 |
| 57.31 | 6.03 | 57.7 | 93.75 | 20.28 | 2 | 38.31 | 7.47 |
| 52.05 | 3.86 | 20.5 | 80.99 | 2 | 47.5 | 36.9 |  |
| 34.39 | 3.49 | 8.61 | 57.17 | 2.95 | 2 | 162 | 12.3 |
| 33.82 | 1.94 | 5.55 | 42.71 | 74.11 | 11.6 | 20 | 5.46 |
| 32.01 | 3.16 | 10.9 | 32.03 | 3.89 | 2 | 500 | 47 |
| 30.45 | 2.52 | 5.59 | 27.97 | 3.69 | 2 |  |  |
| 29.66 | 3.17 | 7.78 | 26.2 | 106.27 | 4.39 |  |  |
| 28.76 | 1.68 | 6.93 | 19.62 | 32.75 | 2.91 |  |  |
| 26.25 |  | 6.34 | 13.28 | 2.23 | 2 |  |  |
| 24.22 | 3.98 | 6.89 | 11.94 | 18.61 | 7.62 |  |  |
| 23.91 | 0.91 | 27.6 | 11.53 | 9.15 | 2 |  |  |
| 23.75 | 1.95 | 7.82 | 10.31 | 37.16 | 5.59 |  |  |
| 23.1 | 5.35 | 46.2 | 6.81 | 2.64 | 2 |  |  |
| 19.95 | 0.55 |  | 0 | 2 | 2 |  |  |
| 17.83 | 2.59 | 8.98 | 0 | 2 | 2 |  |  |
| 16.81 | 2.87 | 5.9 | 0 | 2 | 2 |  |  |
| 15.13 | 3.93 | 5.45 | 0 | 2 | 2 |  |  |
| 11.21 | 2.57 | 5.99 | 0 | 2 | 2 |  |  |
| 10.05 | 1.69 | 3.91 | 0 | 2 | 2 |  |  |
| 6.76 | 2.18 | 4.29 | 0 | 2 | 2 |  |  |
| 6.16 | 3.35 | 5.62 | 0.58 | 2 | 2.61 |  |  |
| 4.17 | 2.5 | 2.98 | 33.2 | 89.69 | 96.6 |  |  |
| 3.01 | 0.96 | 2.36 | 0.08 | 6.41 | 4 |  |  |
| 2.71 | 1.18 | 1.42 | 27.64 | 33.01 | 30 |  |  |
| 2.18 | 1.31 | 2.2 | 117.56 | 184.89 | 107 |  |  |
| 0.4 | 1.01 | 2.17 | 0 | 2 | 2 |  |  |
| 0 | 1.05 | 1.65 | 397.97 | 1340.18 | 518 |  |  |
| 0 | 1.03 | 2.19 | 253.91 | 610.94 | 230 |  |  |
| 0 | 1.2 | 2.92 | 74.02 | 147.79 | 62.4 |  |  |
| 0 | 0.99 | 2.3 | 20.46 | 41.42 | 22.7 |  |  |
| 0 | 0.95 | 1.81 |  |  |  |  |  |
| 0 | 1.06 | 2.07 |  |  |  |  |  |
| 0 | 1.51 | 2.16 |  |  |  |  |  |
| 0 | 0.94 | 1.07 |  |  |  |  |  |
| 19.38 | 6.03 | 24.5 |  |  |  |  |  |
| 131.8 | 28.59 | 191 |  |  |  |  |  |
| 32.64 | 6.47 | 13.4 |  |  |  |  |  |
| 407.83 | 52.77 | 307 |  |  |  |  |  |
| 40.05 | 7.04 | 40.2 |  |  |  |  |  |
| 0 | 1.23 | 2.35 |  |  |  |  |  |
| 253.05 | 17.46 | 253 |  |  |  |  |  |
| 118.01 | 8.89 | 117 |  |  |  |  |  |
| 35.05 | 5.92 | 26 |  |  |  |  |  |
| 19.74 | 3.63 | 8.18 |  |  |  |  |  |
